# Supplementary material
Source: MDPI journal article supplement (https://www.mdpi.com/2673-4583/3/1/96)
Supplement: s1 [file s1]

# Supplementary Material

## DNA-binding properties of cytotoxic naphthindolizinedione-carboxamides acting as type II Topoisomerase inhibitors. A combined *in silico* and experimental study

Andrea Defant <sup>1</sup>, Paolo Gatti <sup>1</sup>, Alessandro Poli <sup>1</sup>, Marta Serena <sup>2</sup>, Alice Sosic <sup>2</sup>, Barbara Gatto <sup>2</sup> and Ines Mancini <sup>1,\*</sup>

<sup>1</sup> Department of Physics, Laboratory of Bioorganic Chemistry, University of Trento, Via Sommarive 14, I-38123 Povo-Trento, Italy; andrea.defant@unitn.it; paolo.gatti.1@alumni.unitn.it; ines.mancini@unitn.it

alessandro.poli@scuole.provincia.tn.it; ines.mancini@unitn.it

<sup>2</sup> Department of Pharmaceutical and Pharmacological Sciences, University of Padova, via F. Marzolo 5, 35131 Padova, Italy; marta.serena87@gmail.com; alice.sosic@unipd.it; barbara.gatto@unipd.it

### Contents

1. General Experimental Methods
2. Preparation and use of (CGCGAATTCGCG)<sub>2</sub> oligonucleotide
3. Spectroscopic Analyses
  - 3.1. Binding constants evaluation by UV/Vis spectroscopy
  - 3.2. Thermal denaturation analysis
  - 3.3. Circular dichroism
4. Human topoisomerase II $\alpha$  inhibition
5. References

**Figure S1.** View by docking calculation of compound **3** interacting inside the topoisomerase II (PDB ID: 3QX3) cleavage site: in free base form (a) and in protonated form (b). The tyrosine residue mediating DNA cut is drawn in magenta, H-bridge is shown by green circles, the phosphate-deoxyribose bond broken by tyrosine is depicted in green dashed line.

**Figure S2.** UV-Vis spectra used for the calculation of molar extinction coefficient, recorded in 240-500 nm range, for buffer solutions (Tris-HCl 10mM, NaCl 20mM, pH= 7.5) of compounds. (a) **1**, (b) **2**, (c) **3**.

**Figure S3.** DNA thermal denaturation based on melting temperature (T<sub>m</sub>) analysis by compound **1-3** in comparison with mitoxantrone.

**Figure S4.** Overlapped CD spectra of DNA complexes using comparable concentrations of each ligand **1-3** and mitoxantrone, in comparison with the spectrum of free *Calf thymus* DNA.

**Figure S5.** Inhibition of human topoisomerase II $\alpha$  decatenation assay by compounds **1-3** used at increased concentrations (0.1-1-10-100 $\mu$ M); B, blank; C, control (+enzyme).

**Figure S6.** Inhibition of human topoisomerase II $\alpha$  decatenation assay by mitoxantrone: 200ng of kDNA were incubated with increasing concentrations (0.1-0.5-1-5 -10 $\mu$ M) of mitoxantrone and human topoisomerase II $\alpha$  and loaded in 1% agarose gel in TBE (90 mM Tris, 90 mM boric acid, 20 mM EDTA); running buffer TBE; gel run was 1.5 h at 4 V/cm. B, blank; C, control (+enzyme). Staining with ethidium bromide 0.5 $\mu$ g/mL.

**Table S1.** Equilibrium constants and T<sub>m</sub> values for the indicated *Calf thymus* DNA complexes, in 10 mM TRIS buffer solution, using each ligand as hydrochloride salts.

**Table S2.** Inhibition of human topoisomerase II $\alpha$  decatenation assay IC<sub>50</sub> values for **1-3** and mitoxantrone.

## 1. General Experimental Methods

Deoxyribonucleic acid sodium salt from *Calf thymus* (CG = 41.9%) and dihydrochloride mitoxantrone were from Sigma. Synthetic CGCGAATTCGCG oligonucleotide (GC = 66.7%) was bought from Thermo Fisher Scientific. Reagents and solvents were used without purification. All evaporations were carried out at room temperature at reduced pressure. UV-Visible spectra were recorded with a double beam spectrophotometer UVIKON 923. The DNA melting point has been obtained by JASCO V-550 UV/Vis Spectrophotometer equipped with a thermostatic unit. CD spectra were recorded with a Jasco J-710 spectrophotometer. pH Measurements were obtained by pH-meter Delta OHM H2256.

## 2. Preparation and use of (CGCGAATTCGCG)<sub>2</sub> oligonucleotide

Single strand oligonucleotide, dissolved in DNase/RNase free 10mM Tris, was heated at 85°C for 5 minutes and slowly cooled during 12 hours till room temperature. It was used in UV analysis of the complex with compound **2** at a fixed concentration (18.3  $\mu$ M) and at increasing oligonucleotide amounts (from 1.4 to 5.6  $\mu$ M).

## 3. Spectroscopic Analyses

### 3.1. Binding constants evaluation by UV/Vis spectroscopy

A stock solution of *Calf thymus* DNA was diluted in 10 mM Tris (pH 5.8) and the exact concentration was determined by UV/vis spectroscopic analysis ( $\lambda = 260$  nm,  $\epsilon = 13200$  M<sup>-1</sup> cm<sup>-1</sup> established relatively to base pairs). The same procedure has been applied for protonated salts of compounds **1** ( $\lambda = 331$  nm,  $\epsilon = 8791$  M<sup>-1</sup> cm<sup>-1</sup>), **2** ( $\lambda = 323$  nm,  $\epsilon = 12208$  M<sup>-1</sup> cm<sup>-1</sup>), **3** ( $\lambda = 339$  nm,  $\epsilon = 8710$  M<sup>-1</sup> cm<sup>-1</sup>) and mitoxantrone ( $\lambda = 660$  nm,  $\epsilon = 19684$  M<sup>-1</sup> cm<sup>-1</sup>). DNA solution (in the range 1,6 ÷ 16  $\mu$ M) was incubated individually with compound **1**, **2**, **3** or mitoxantrone at 20  $\mu$ M for 90 minutes at room temperature in the dark. The complexes and the controls were subjected to spectroscopic analysis by a double beam spectrophotometer UVIKON 923 equipped with quartz cuvettes. The calculation of binding constants was achieved following two different approaches reported in literature[1,2], obtaining comparable results (Figure S2).

### 3.2. Thermal denaturation analysis

DNA melting experiments were carried out by monitoring the absorbance (260 nm) of *Calf thymus* DNA (14  $\mu$ M base-pairs) at different temperatures, ranged between 40 and 90 °C, in the absence and presence of the complex, in a 1:1 DNA/complex ratio. Measurements were performed by a JASCO V-550 UV/Vis spectrophotometer equipped with a thermostatic unit. The solution containing the complex and *Calf thymus* DNA in 10 mM Tris buffer (pH 5.8) was heated with a rate of temperature increase of 1°C/ min and reading the absorbance at  $\Delta T = 0.25$  °C- (Figure S3).

### 3.3. Circular dichroism

It was performed using a Jasco J-710 spectrophotometer. The spectra of *Calf thymus* DNA (60  $\mu$ M) or synthetic oligonucleotide in 10 mM Tris pH 5.8 and in the absence and presence of various concentrations of each compound **1-3** and mitoxantrone was recorded in the range of 220– 305 nm with a spectral resolution of 1 nm. The scan speed was 20 nm/min and the response time was 0.3330 sec with a band width of 1 nm. Quartz cell with a path length of 10 mm was used and all measurements were carried out at 25°C. Results are expressed as molar ellipticity  $[\theta]$ , in deg  $\times$  cm<sup>2</sup>  $\times$  dmol<sup>-1</sup> (Figure S4).

## 4. Human topoisomerase II $\alpha$ inhibition

The assay was performed according to the reported protocol [3] with minor modifications. The reaction was made in a final volume of 20 $\mu$ l; each sample was constituted by 200ng of kDNA, assay buffer (containing Tris HCl 50mM pH=7.5, NaCl 125mM, MgCl<sub>2</sub> 10mM, DTT 5mM and albumin 100 $\mu$ g/ml), ATP 10mM, 1U of human topoisomerase II $\alpha$  (provided by Inspiralis Ltd, UK) and 2 $\mu$ l of compound solution, to have the desired final concentration. Samples were incubated for 60 min at 37°C and then stopped with 4 $\mu$ l of gel loading buffer made with 49% TE (10mM Tris, 1mM EDTA, 20mM NaCl, pH 7.4), 49% glycerol, 2% SDS, 0.025% bromophenol blue, and 0.025% xylene cyanol. Samples are resolved by electrophoresis on a 1% agarose gel running in 1X TBE

buffer (90mM Tris, 90mM boric acid, 20mM EDTA); the arrays for the electrophoresis are the Sub-Cell GT type provided by Bio-Rad. Gel was stained post run with an ethidium bromide solution 0.5 $\mu$ g/ml for 30 min. The bands were detected using the Geliance 600 Imaging System and densitometric analysis was performed using the software Gene tools from Perkin-Elmer. In each gel a blank control containing only kDNA, which correspond to 0% of activity, and a control containing kDNA end enzyme, corresponding to 100% of topoisomerase II $\alpha$  activity, were added (Figures S5 and S6). The concentration of the inhibitor preventing 50% of the substrate (knotted DNA) from being converted into the reaction product (unknotted DNA) was determined from a standard sigmoid curve. By averaging at least three experiments, the IC<sub>50</sub> values and the standard deviation were determined.

## 5. References

1. Strat, D.; Missailidis, S.; Drake, A.F. A novel methodological approach for the analysis of host-ligand interactions. *ChemPhysChem* **2007**, *8*, 270-278. doi: 10.1002/cphc.200600442
2. Stootman, F.H.; Fisher, D.M.; Rodger, A.; Aldrich-Wright, J.R. Improved curve fitting procedures to determine equilibrium binding constants. *Analyst* **2006**, *131*, 1145-1151. doi: 10.1039/B604686J
3. Furlanetto, V.; Zagotto, G.; Pasquale, R.; Moro, S.; Gatto B. Ellagic acid and polyhydroxylated urolithins are potent catalytic inhibitors of human topoisomerase II: an *in vitro* study. *J. Agric. Food. Chem.* **2012**, *60*, 9162-9170. doi: 10.1021/jf302600q

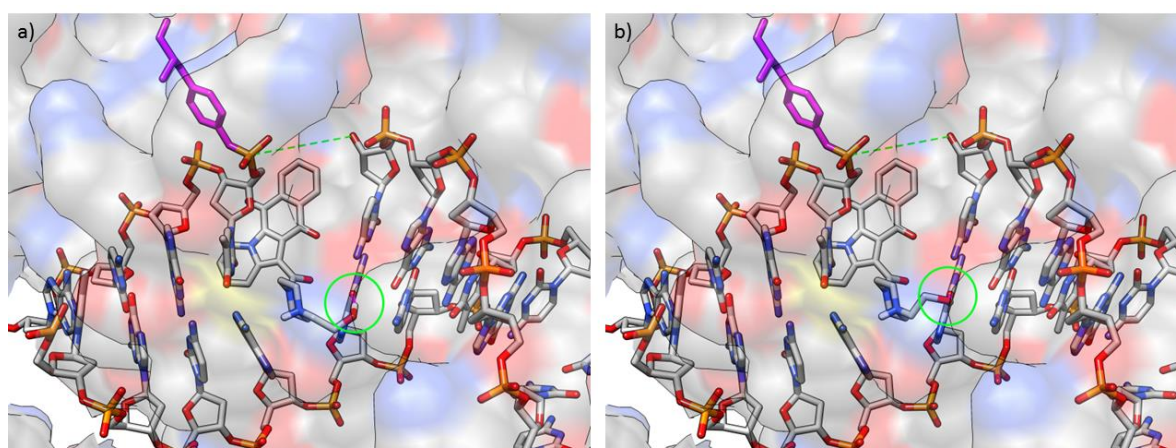

**Figure S1.** View by docking calculation of compound 3 interacting inside the topoisomerase II (PDB ID: 3QX3) cleavage site: in free base form (a) and in protonated form (b). The tyrosine residue mediating DNA cut is drawn in magenta, H-bridge is shown by green circles, the phosphate-deoxyribose bond broken by tyrosine is depicted in green dashed line.

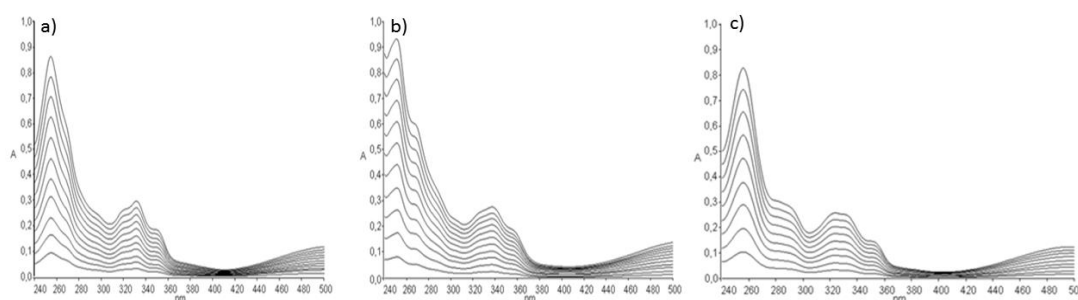

**Figure S2.** UV-Vis spectra used for the calculation of molar extinction coefficient, recorded in 240-500 nm range, for buffer solutions (Tris-HCl 10mM, NaCl 20mM, pH= 7.5) of compounds. (a) 1, (b) 2, (c).

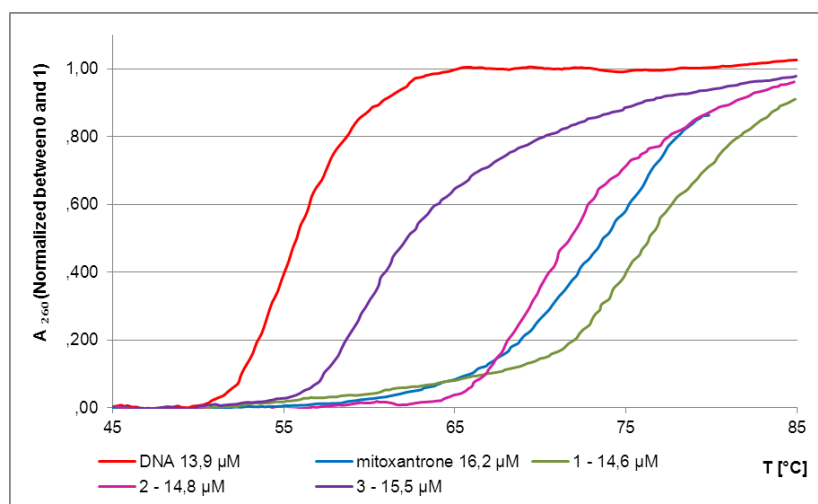

**Figure S3.** DNA thermal denaturation based on melting temperature ( $T_m$ ) analysis by compound 1-3 in comparison with mitoxantrone.

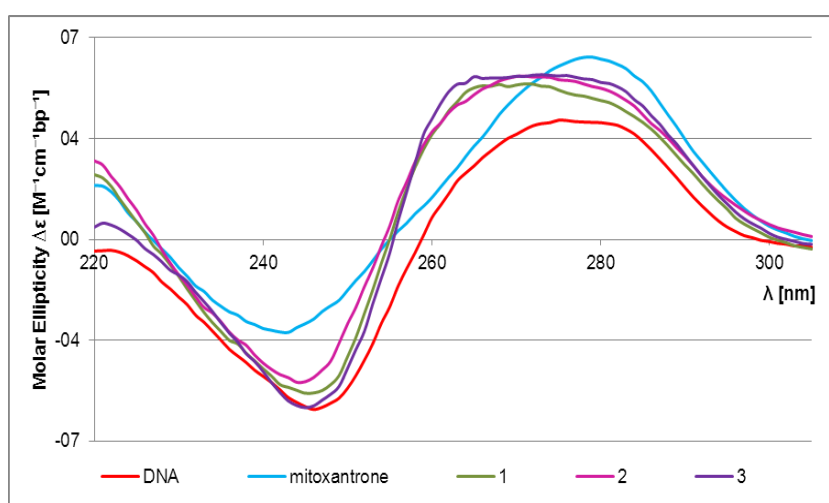

**Figure S4.** Overlapped CD spectra of DNA complexes using comparable concentrations of each ligand 1-3 and mitoxantrone, in comparison with the spectrum of free *Calf thymus* DNA.

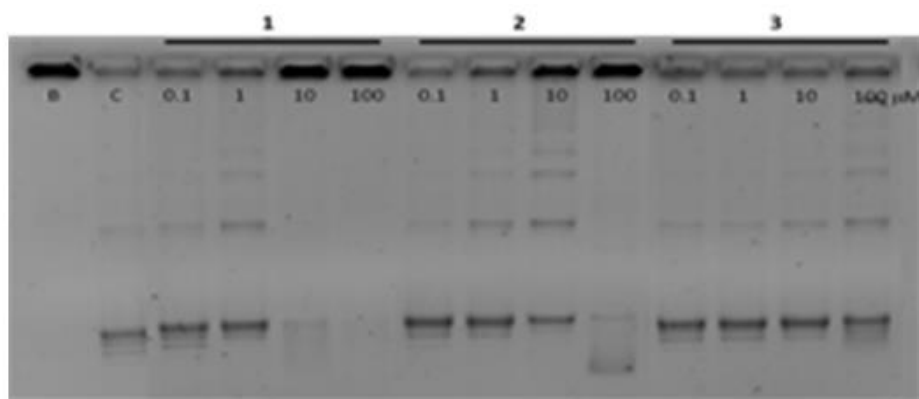

**Figure S5.** Inhibition of human topoisomerase II $\alpha$  decatenation assay by compounds 1-3 used at increased concentrations (0.1-1-10-100 $\mu$ M); B, blank; C, control (+enzyme).

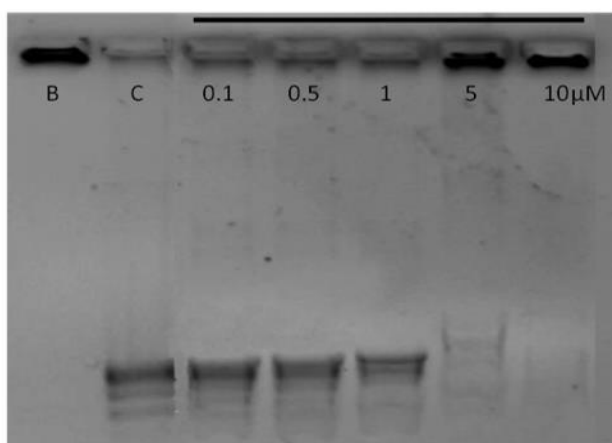

**Figure S6.** Inhibition of human topoisomerase II $\alpha$  decatenation assay by mitoxantrone: 200ng of kDNA were incubated with increasing concentrations (0.1-0.5-1-5 -10 $\mu$ M) of mitoxantrone and human topoisomerase II $\alpha$  and loaded in 1% agarose gel in TBE (90 mM Tris, 90 mM boric acid, 20 mM EDTA); running buffer TBE; gel run was 1.5 h at 4 V/cm. B, blank; C, control (+enzyme). Staining with ethidium bromide 0.5 $\mu$ g/mL.

**Table S1.** Equilibrium constants and  $T_m$  values for the indicated *Calf thymus* DNA complexes, in 10 mM TRIS buffer solution, using each ligand as hydrochloride salts

| System           | K<br>[M <sup>-1</sup> ]     | T <sub>m</sub><br>[°C] | ΔT <sub>m</sub><br>[°C] |
|------------------|-----------------------------|------------------------|-------------------------|
| DNA              | -                           | 55.8±0.1               | -                       |
| DNA/1            | (2,2 ± 0,3)·10 <sup>6</sup> | 76.3±0.1               | 20.5±0.2                |
| DNA/2            | (3,2 ± 0,3)·10 <sup>6</sup> | 71.7±0.1               | 15.9±0.2                |
| DNA/3            | (3,6 ± 0,1)·10 <sup>5</sup> | 62.2±0.1               | 6.4±0.2                 |
| DNA/Mitoxantrone | (2,3 ± 0,1)·10 <sup>5</sup> | 73.6±0.1               | 17.8±0.2                |

**Table S2.** Inhibition of human topoisomerase IIα decatenation assay: IC<sub>50</sub> values for 1-3 and mitoxantrone

| Compound     | IC <sub>50</sub> (μM) |
|--------------|-----------------------|
| 1            | 1.78±0.32             |
| 2            | 7.83±3.33             |
| 3            | >100                  |
| Mitoxantrone | 2.54±0.25             |
